# Supplementary material
Source: PubMed Central journal article supplement (PMC6141023)
Supplement: NIHMS1505463-supplement-1.pdf [file NIHMS1505463-supplement-1.pdf]

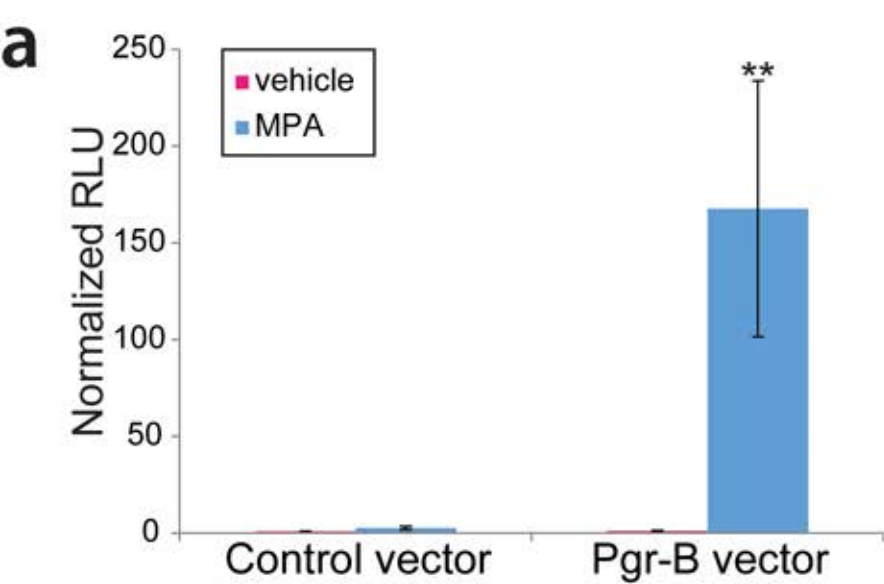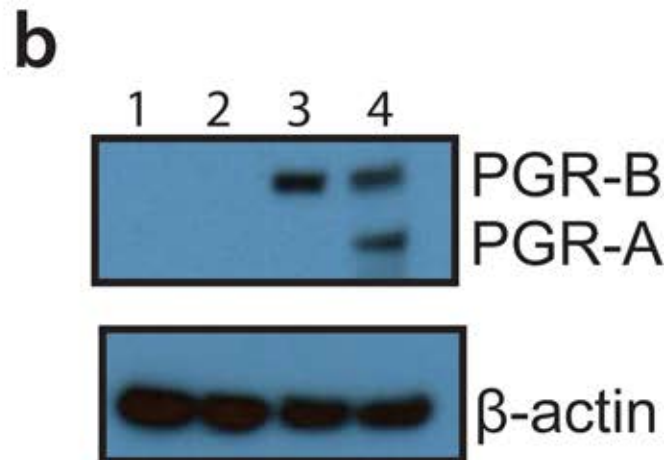

**a**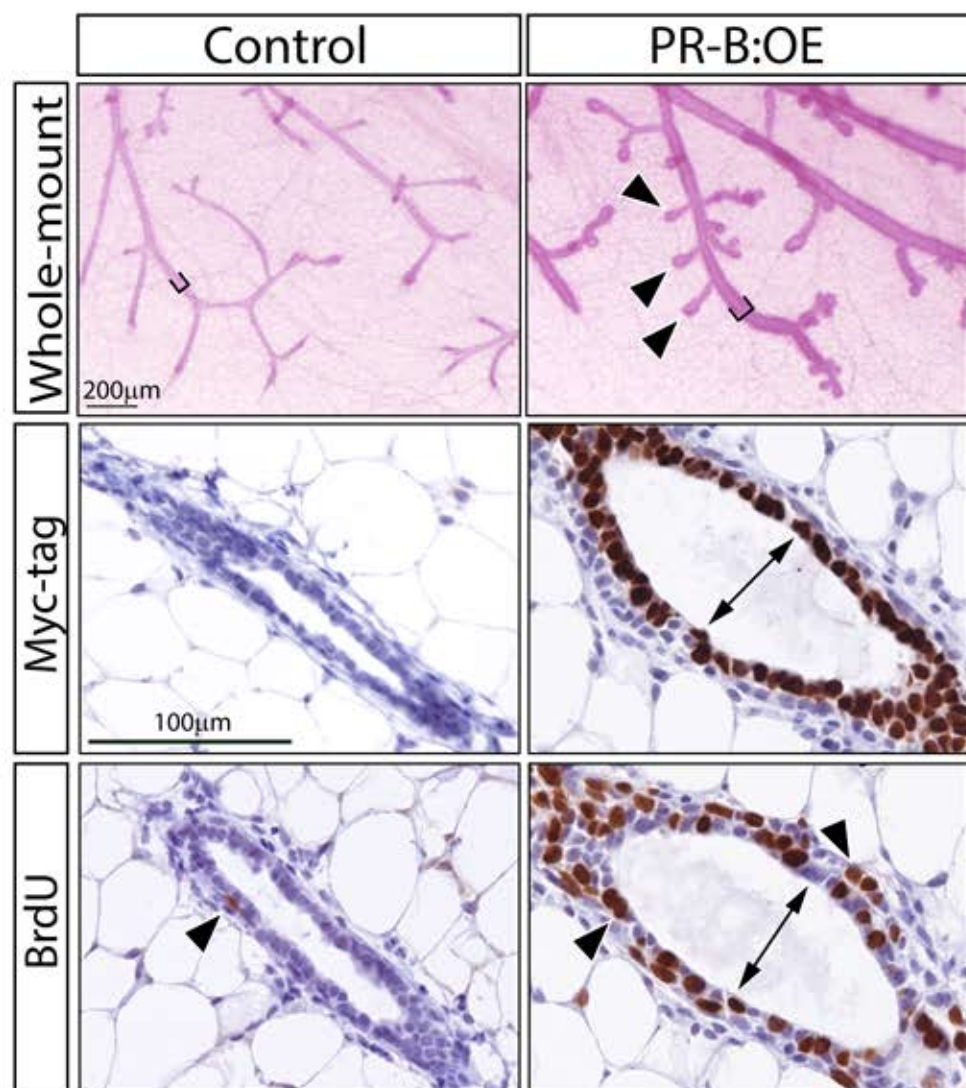**b**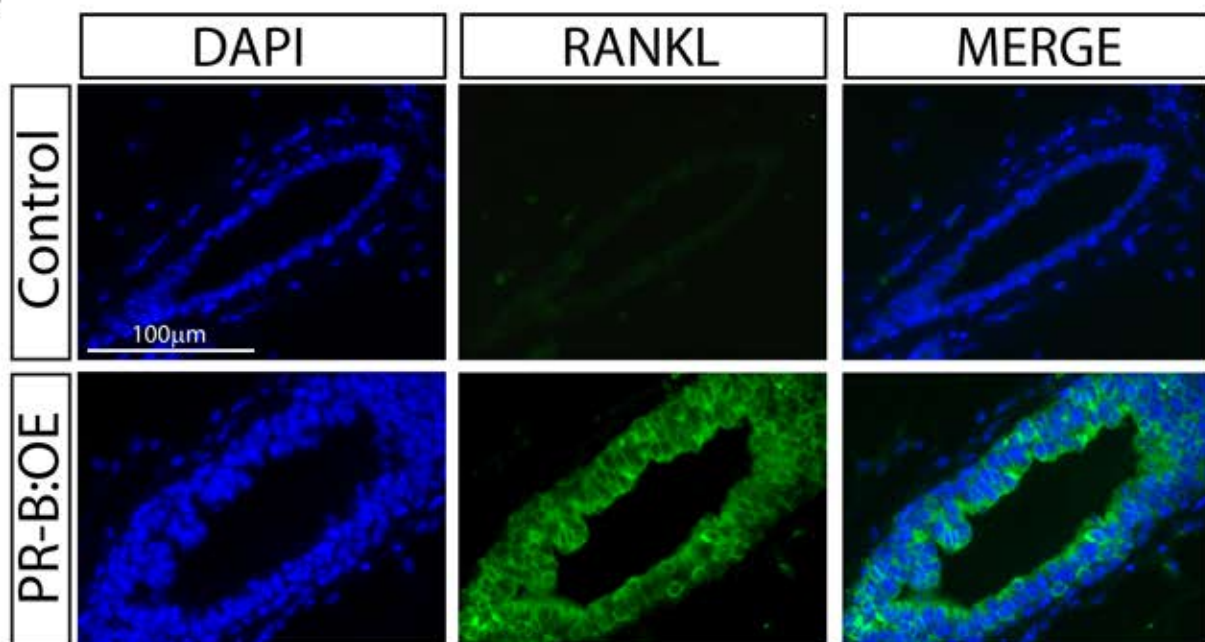

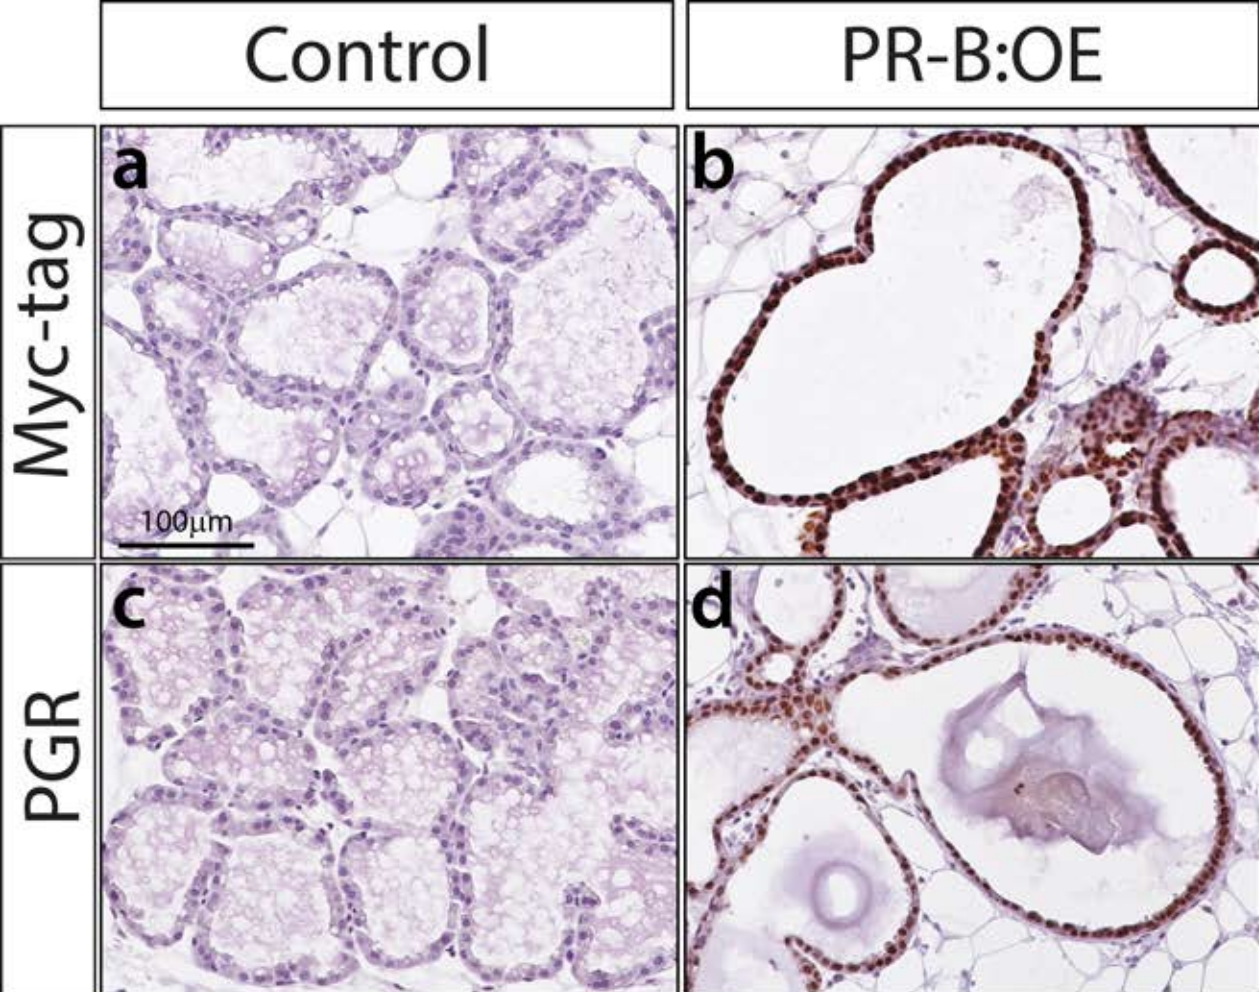



| Gene                                                | Gene ID | Assay ID      |
|-----------------------------------------------------|---------|---------------|
| Amphiregulin                                        | Areg    | Mm01354339_m1 |
| Calcitonin                                          | Calca   | Mm00801463_m1 |
| Cyclin D1                                           | Ccnd1   | Mm00432359_m1 |
| Casein beta                                         | Csn2    | Mm04207885_m1 |
| Early growth response protein 1                     | Egr1    | Mm00656724_m1 |
| Early growth response protein 2                     | Egr2    | Mm00456650_m1 |
| DNA-binding protein inhibitor 4                     | Id4     | Mm00499701_m1 |
| Iroquois homeobox protein 4                         | Irx4    | Mm01340286_m1 |
| Progesterone receptor                               | Pgr     | Mm00435628_m1 |
| Transcription factor factor AP-2-alpha              | Tfap2a  | Mm00495574_m1 |
| Transcription factor factor AP-2-beta               | Tfap2b  | Mm00493468_m1 |
| Transcription factor factor AP-2-gamma              | Tfap2c  | Mm00493473_m1 |
| Tumor necrosis factor ligand superfamily member 11  | Tnfsf11 | Mm00441906_m1 |
| Whey acidic protein                                 | Wap     | Mm00839913_m1 |
| Wingless-type MMTV integration site family member 4 | Wnt4    | Mm01194003_m1 |

# Supporting Information Table S1
